# Supplementary material for: N-myc downstream-regulated gene 1 inhibits the proliferation of colorectal cancer through emulative antagonizing NEDD4-mediated ubiquitylation of p21
Source: J Exp Clin Cancer Res. 2019 Dec 12;38:490. doi: 10.1186/s13046-019-1476-5 (PMC6909641; doi:10.1186/s13046-019-1476-5)
Supplement: Supplementary file 1 — Additional file 1: Table S1. Twenty overlapped E3 ligases which may simultaneously interact with both NDRG1 and p21. [file 13046_2019_1476_MOESM1_ESM.xlsx]

## Sheet: p21
p21 related E3 ligases
	E3GENE	SUB	SUBGENE	HOMO	PFAM	GO	NET	MOTIF	SCORE
P49792	RANBP2	P38936	CDKN1A	1	3.32	2.93	1.84	1	0.778
Q86T96	RNF180	P38936	CDKN1A	1	3.17	1.13	1	3.41	0.748
Q14258	TRIM25	P38936	CDKN1A	1	3.17	1.25	1.44	2.12	0.747
O00463	TRAF5	P38936	CDKN1A	1	2.47	2.33	2.39	1	0.736
Q9NS56	TOPORS	P38936	CDKN1A	1	2.47	2.33	1.69	1	0.729
P35226	BMI1	P38936	CDKN1A	1	2.47	2.33	1.69	1	0.729
P22681	CBL	P38936	CDKN1A	1	2.47	2.93	1.31	1	0.726
P38398	BRCA1	P38936	CDKN1A	1	2.47	2.33	1.57	1	0.722
P19474	TRIM21	P38936	CDKN1A	1	3.17	1.51	1.77	1	0.717
Q8WY64	MYLIP	P38936	CDKN1A	1	3.17	1.25	1	2.12	0.716
Q86XK2	FBXO11	P38936	CDKN1A	1	3.18	1.25	1.84	1	0.704
Q96CA5	BIRC7	P38936	CDKN1A	1	3.17	1.25	2.39	1	0.703
Q15751	HERC1	P38936	CDKN1A	1	3.17	1.25	1.84	1	0.703
Q13489	BIRC3	P38936	CDKN1A	1	3.17	1.25	2.39	1	0.703
Q6UWE0	LRSAM1	P38936	CDKN1A	1	3.17	1.25	2.39	1	0.703
P46934	NEDD4	P38936	CDKN1A	1	1	2.33	1.87	2.12	0.701
Q5XPI4	RNF123	P38936	CDKN1A	1	3.17	1.25	1.77	1	0.7
Q86WT6	TRIM69	P38936	CDKN1A	1	3.17	1.25	1.77	1	0.7
P35637	FUS	P38936	CDKN1A	1	3.32	1.25	1.69	1	0.7
Q9NXK8	FBXL12	P38936	CDKN1A	1	3.18	1.25	1.77	1	0.7
Q96BD6	SPSB1	P38936	CDKN1A	1	3.17	1.25	1.77	1	0.7
Q9C026	TRIM9	P38936	CDKN1A	1	3.17	1.25	1.77	1	0.7
P14373	TRIM27	P38936	CDKN1A	1	3.17	1.51	1.87	1	0.698
Q9ULV8	CBLC	P38936	CDKN1A	1	3.17	1.27	1.69	1	0.697
Q9UKB1	FBXW11	P38936	CDKN1A	1	3.18	1.25	1.69	1	0.696
Q969H0	FBXW7	P38936	CDKN1A	1	3.18	1.25	2.2	1	0.696
Q13490	BIRC2	P38936	CDKN1A	1	3.17	1.25	2.2	1	0.695
Q13191	CBLB	P38936	CDKN1A	1	3.17	1.25	1.69	1	0.695
P35227	PCGF2	P38936	CDKN1A	1	2.47	1.51	2.3	1	0.694
Q969U6	FBXW5	P38936	CDKN1A	1	3.18	1.13	1.77	1	0.691
Q06587	RING1	P38936	CDKN1A	1	2.47	1.51	2.2	1	0.69
Q9BVG3	TRIM62	P38936	CDKN1A	1	3.17	1.13	1.77	1	0.69
Q86YT6	MIB1	P38936	CDKN1A	1	3.17	1.51	1.29	1	0.688
Q9Y297	BTRC	P38936	CDKN1A	1	3.18	1.25	1.44	1.06	0.686
Q86TM6	SYVN1	P38936	CDKN1A	1	1	1.25	1.69	2.8	0.684
P98170	XIAP	P38936	CDKN1A	1	3.17	1.25	1.7	1	0.681
Q86XN8	MEX3D	P38936	CDKN1A	1	3.17	1.25	1.44	1	0.681
Q8WZ73	RFFL	P38936	CDKN1A	1	3.17	1.25	1.44	1	0.681
Q8NFZ0	FBXO18	P38936	CDKN1A	1	3.18	1.25	1.44	1	0.681
Q9UJV3	MID2	P38936	CDKN1A	1	3.17	1.25	1.44	1	0.681
Q99496	RNF2	P38936	CDKN1A	1	2.47	1.25	1.77	1	0.676
Q7Z6J0	SH3RF1	P38936	CDKN1A	1	2.47	1.25	1.77	1	0.676
P15918	RAG1	P38936	CDKN1A	1	2.47	1.25	1.77	1	0.676
Q9UNE7	STUB1	P38936	CDKN1A	1	1	3.77	1.7	1	0.676
O75150	RNF40	P38936	CDKN1A	1	2.47	1.25	2.2	1	0.672
Q9BUZ4	TRAF4	P38936	CDKN1A	1	2.47	1.25	1.69	1	0.672
Q8NHY2	RFWD2	P38936	CDKN1A	1	2.47	1.25	1.69	1	0.672
Q8N531	FBXL6	P38936	CDKN1A	1	3.18	1.13	1.44	1	0.671
Q13356	PPIL2	P38936	CDKN1A	1	1	2.93	1.77	1	0.671
P02511	CRYAB	P38936	CDKN1A	1	1	2.93	2.3	1	0.671
Q8NCQ5	FBXO15	P38936	CDKN1A	1	3.18	1.25	1.29	1	0.67
Q8IYM9	TRIM22	P38936	CDKN1A	1	3.17	1.25	1.29	1	0.67
Q9UKA1	FBXL5	P38936	CDKN1A	1	3.18	1.25	1.29	1	0.67
Q96F44	TRIM11	P38936	CDKN1A	1	3.17	1.25	1.29	1	0.67
Q9UKT7	FBXL3	P38936	CDKN1A	1	3.18	1.25	1.29	1	0.67
Q9C035	TRIM5	P38936	CDKN1A	1	3.17	1.51	1	1	0.664
Q9NRD1	FBXO6	P38936	CDKN1A	1	3.18	1.13	1.29	1	0.661
Q9H4M3	FBXO44	P38936	CDKN1A	1	3.18	1.13	1.29	1	0.661
Q96EF6	FBXO17	P38936	CDKN1A	1	3.18	1.13	1.29	1	0.661
Q8N2W9	PIAS4	P38936	CDKN1A	1	1	1.25	1.7	2.8	0.66
Q7Z6M2	FBXO33	P38936	CDKN1A	1	3.18	1	1.44	1	0.659
Q9NS91	RAD18	P38936	CDKN1A	1	2.47	1.25	1.44	1	0.657
P28328	PEX2	P38936	CDKN1A	1	2.47	1.25	1.44	1	0.657
Q9BYE7	PCGF6	P38936	CDKN1A	1	2.47	1.25	1.44	1	0.657
Q96J02	ITCH	P38936	CDKN1A	1	1	1.25	1.69	2.12	0.657
Q8TBB1	LNX1	P38936	CDKN1A	1	2.47	1.25	1.87	1	0.657
Q9HCE7	SMURF1	P38936	CDKN1A	1	1	2.88	1.87	1.06	0.655
P43034	PAFAH1B1	P38936	CDKN1A	1	1	2.33	2.39	1	0.653
O95630	STAMBP	P38936	CDKN1A	1	1	2.33	1.84	1	0.653
P11142	HSPA8	P38936	CDKN1A	1	1	2.93	1.87	1	0.651
Q96ME1	FBXL18	P38936	CDKN1A	1	3.18	1	1.29	1	0.649
Q96EP1	CHFR	P38936	CDKN1A	1	1	2.33	1.77	1	0.649
Q9UKT4	FBXO5	P38936	CDKN1A	1	1	2.33	1.77	1	0.649
Q96CD0	FBXL8	P38936	CDKN1A	1	3.18	1	1.29	1	0.649
Q96RE7	NACC1	P38936	CDKN1A	1	1	2.33	1.77	1	0.649
Q96C24	SYTL4	P38936	CDKN1A	1	1	2.33	2.3	1	0.649
Q9NR64	KLHL1	P38936	CDKN1A	1	1	2.33	1.77	1	0.649
Q8IX29	FBXO16	P38936	CDKN1A	1	3.18	1	1.29	1	0.649
O76064	RNF8	P38936	CDKN1A	1	1	2.33	2.3	1	0.649
P41002	CCNF	P38936	CDKN1A	1	1	2.33	2.3	1	0.649
P62873	GNB1	P38936	CDKN1A	1	1	2.33	2.3	1	0.649
O75159	SOCS5	P38936	CDKN1A	1	1	2.33	1.77	1	0.649
Q9BSM1	PCGF1	P38936	CDKN1A	1	2.47	1.27	1.29	1	0.647
Q12933	TRAF2	P38936	CDKN1A	1	2.47	1.25	1.7	1	0.647
Q9NTX7	RNF146	P38936	CDKN1A	1	2.47	1.13	1.44	1	0.647
Q96IG2	FBXL20	P38936	CDKN1A	1	3.18	1.25	1	1	0.646
Q86UW9	DTX2	P38936	CDKN1A	1	2.47	1.25	1.29	1	0.646
Q8IU81	IRF2BP1	P38936	CDKN1A	1	2.47	1.25	1.29	1	0.646
P57775	FBXW4	P38936	CDKN1A	1	3.18	1.25	1	1	0.646
Q5XUX0	FBXO31	P38936	CDKN1A	1	3.18	1.25	1	1	0.646
Q9H2S5	RNF39	P38936	CDKN1A	1	3.17	1.25	1	1	0.645
O15344	MID1	P38936	CDKN1A	1	3.17	1.25	1	1	0.645
Q96AX9	MIB2	P38936	CDKN1A	1	3.17	1.25	1	1	0.645
Q96A44	SPSB4	P38936	CDKN1A	1	3.17	1.25	1	1	0.645
Q969V5	MUL1	P38936	CDKN1A	1	3.17	1.25	1	1	0.645
Q9UDY6	TRIM10	P38936	CDKN1A	1	3.17	1.25	1	1	0.645
Q969K3	RNF34	P38936	CDKN1A	1	3.17	1.25	1	1	0.645
Q9ULJ6	ZMIZ1	P38936	CDKN1A	1	1	2.33	1.69	1	0.645
Q8WV44	TRIM41	P38936	CDKN1A	1	3.17	1.25	1	1	0.645
Q99619	SPSB2	P38936	CDKN1A	1	3.17	1.25	1	1	0.645
P40337	VHL	P38936	CDKN1A	1	1	2.33	1.69	1	0.645
O43663	PRC1	P38936	CDKN1A	1	1	2.33	1.99	1	0.645
Q96GD4	AURKB	P38936	CDKN1A	1	1	2.33	2.2	1	0.645
Q9C037	TRIM4	P38936	CDKN1A	1	3.17	1.25	1	1	0.645
Q9C030	TRIM6	P38936	CDKN1A	1	3.17	1.25	1	1	0.645
Q9C029	TRIM7	P38936	CDKN1A	1	3.17	1.25	1	1	0.645
Q9BYJ4	TRIM34	P38936	CDKN1A	1	3.17	1.25	1	1	0.645
O76050	NEURL1	P38936	CDKN1A	1	3.17	1.25	1	1	0.645
Q86XT4	TRIM50	P38936	CDKN1A	1	3.17	1.25	1	1	0.645
Q9NQ86	TRIM36	P38936	CDKN1A	1	3.17	1.25	1	1	0.645
Q96LD4	TRIM47	P38936	CDKN1A	1	3.17	1.25	1	1	0.645
O43684	BUB3	P38936	CDKN1A	1	1	2.33	2.2	1	0.645
Q9UPQ4	TRIM35	P38936	CDKN1A	1	3.17	1.25	1	1	0.645
Q6AZZ1	TRIM68	P38936	CDKN1A	1	3.17	1.25	1	1	0.645
Q6ZTA4	TRIM67	P38936	CDKN1A	1	3.17	1.25	1	1	0.645
Q5U5Q3	MEX3C	P38936	CDKN1A	1	3.17	1.25	1	1	0.645
Q12899	TRIM26	P38936	CDKN1A	1	3.17	1.25	1	1	0.645
Q13064	MKRN3	P38936	CDKN1A	1	2.47	1.51	1	1	0.639
Q8TEJ3	SH3RF3	P38936	CDKN1A	1	2.47	1.13	1.29	1	0.636
Q8N448	LNX2	P38936	CDKN1A	1	2.47	1.13	1.29	1	0.636
Q9BY78	RNF26	P38936	CDKN1A	1	3.17	1.13	1	1	0.635
O60291	MGRN1	P38936	CDKN1A	1	3.17	1.13	1	1	0.635
Q96BQ3	TRIM43	P38936	CDKN1A	1	3.17	1.13	1	1	0.635
Q6PJ69	TRIM65	P38936	CDKN1A	1	3.17	1.13	1	1	0.635
Q495X7	TRIM60	P38936	CDKN1A	1	3.17	1.13	1	1	0.635
Q6ZMU5	TRIM72	P38936	CDKN1A	1	3.17	1.13	1	1	0.635
P0CI25	TRIM49	P38936	CDKN1A	1	3.17	1.13	1	1	0.635
Q8TF61	FBXO41	P38936	CDKN1A	1	3.18	1.13	1	1	0.635
Q9H9P5	UNKL	P38936	CDKN1A	1	3.17	1.13	1	1	0.635
Q9C019	TRIM15	P38936	CDKN1A	1	3.17	1.13	1	1	0.635
O75677	RFPL1	P38936	CDKN1A	1	3.17	1.13	1	1	0.635
O75679	RFPL3	P38936	CDKN1A	1	3.17	1.13	1	1	0.635
Q96PX1	RNF157	P38936	CDKN1A	1	3.17	1.13	1	1	0.635
O75678	RFPL2	P38936	CDKN1A	1	3.17	1.13	1	1	0.635
Q5M7Z0	RNFT1	P38936	CDKN1A	1	3.17	1.13	1	1	0.635
Q6ZWI9	RFPL4B	P38936	CDKN1A	1	3.17	1.13	1	1	0.635
Q8IUD6	RNF135	P38936	CDKN1A	1	3.17	1.13	1	1	0.635
Q8IZP6	RNF113B	P38936	CDKN1A	1	3.17	1.13	1	1	0.635
A8MQ27	NEURL1B	P38936	CDKN1A	1	3.17	1.13	1	1	0.635
Q8NG06	TRIM58	P38936	CDKN1A	1	3.17	1.13	1	1	0.635
O00635	TRIM38	P38936	CDKN1A	1	3.17	1.13	1	1	0.635
A6NLU0	RFPL4A	P38936	CDKN1A	1	3.17	1.13	1	1	0.635
Q8NCN4	RNF169	P38936	CDKN1A	1	3.17	1.13	1	1	0.635
Q9HCM9	TRIM39	P38936	CDKN1A	1	3.17	1.13	1	1	0.635
Q9Y577	TRIM17	P38936	CDKN1A	1	3.17	1.13	1	1	0.635
Q8N9V2	TRIML1	P38936	CDKN1A	1	3.17	1.13	1	1	0.635
A6NI03	TRIM64B	P38936	CDKN1A	1	3.17	1.13	1	1	0.635
Q96PU5	NEDD4L	P38936	CDKN1A	1	1	2.33	1.44	1.06	0.634
Q9UM11	FZR1	P38936	CDKN1A	1	1	2.33	1.7	1.06	0.634
Q8N3Y1	FBXW8	P38936	CDKN1A	1	1	1.13	1.44	2.12	0.631
P61024	CKS1B	P38936	CDKN1A	1	1	2.33	1.87	1	0.628
Q9BVA0	KATNB1	P38936	CDKN1A	1	1	2.33	1.44	1	0.628
Q99728	BARD1	P38936	CDKN1A	1	1	2.33	1.87	1	0.628
Q09028	RBBP4	P38936	CDKN1A	1	1	2.33	1.7	1	0.628
O14965	AURKA	P38936	CDKN1A	1	1	2.33	1.44	1	0.628
P56524	HDAC4	P38936	CDKN1A	1	1	2.33	1.44	1	0.628
Q66K89	E4F1	P38936	CDKN1A	1	1	2.33	1.87	1	0.628
Q5VTR2	RNF20	P38936	CDKN1A	1	2.47	1.25	1	1.06	0.626
O95714	HERC2	P38936	CDKN1A	1	1	1.51	1	2.12	0.624
A6NLI5	TRIM64C	P38936	CDKN1A	1	3.17	1	1	1	0.623
Q6P3S6	FBXO42	P38936	CDKN1A	1	3.18	1	1	1	0.623
Q6X9E4	FBXW12	P38936	CDKN1A	1	3.18	1	1	1	0.623
Q6P050	FBXL22	P38936	CDKN1A	1	3.18	1	1	1	0.623
Q6PJ21	SPSB3	P38936	CDKN1A	1	3.17	1	1	1	0.623
Q5XUX1	FBXW9	P38936	CDKN1A	1	3.18	1	1	1	0.623
Q008S8	ECT2L	P38936	CDKN1A	1	3.18	1	1	1	0.623
Q8N1E6	FBXL14	P38936	CDKN1A	1	3.18	1	1	1	0.623
A6NDI0	TRIM49B	P38936	CDKN1A	1	3.17	1	1	1	0.623
Q8N7C3	TRIML2	P38936	CDKN1A	1	3.17	1	1	1	0.623
Q8N4B4	FBXO39	P38936	CDKN1A	1	3.18	1	1	1	0.623
Q5FWF7	FBXO48	P38936	CDKN1A	1	3.18	1	1	1	0.623
P0C2W1	FBXO45	P38936	CDKN1A	1	3.18	1	1	1	0.623
Q96EH8	NEURL3	P38936	CDKN1A	1	3.17	1	1	1	0.623
Q9UF56	FBXL17	P38936	CDKN1A	1	3.18	1	1	1	0.623
O75382	TRIM3	P38936	CDKN1A	1	2.47	1.27	1	1	0.622
Q9H8W5	TRIM45	P38936	CDKN1A	1	2.47	1.25	1	1	0.62
Q86SE9	PCGF5	P38936	CDKN1A	1	2.47	1.25	1	1	0.62
P51948	MNAT1	P38936	CDKN1A	1	1	2.33	1.55	1	0.619
Q3KNV8	PCGF3	P38936	CDKN1A	1	2.47	1.24	1	1	0.619
Q9Y508	RNF114	P38936	CDKN1A	1	2.47	1.24	1	1	0.619
Q92831	KAT2B	P38936	CDKN1A	1	1	2.33	1.3	1	0.618
Q86UW7	CADPS2	P38936	CDKN1A	1	1	2.33	1.29	1	0.617
Q9UNE2	RPH3AL	P38936	CDKN1A	1	1	2.33	1.29	1	0.617
O76071	CIAO1	P38936	CDKN1A	1	1	2.33	1.29	1	0.617
Q9UIG0	BAZ1B	P38936	CDKN1A	1	1	1.78	2.2	1	0.617
P46736	BRCC3	P38936	CDKN1A	1	1	1.78	1.69	1	0.617
Q9BRZ2	TRIM56	P38936	CDKN1A	1	2.47	1.13	1	1	0.61
Q8WVD3	RNF138	P38936	CDKN1A	1	2.47	1.13	1	1	0.61
Q8TEC5	SH3RF2	P38936	CDKN1A	1	2.47	1.13	1	1	0.61
Q86UV7	TRIM73	P38936	CDKN1A	1	2.47	1.13	1	1	0.61
Q6ZRF8	RNF207	P38936	CDKN1A	1	2.47	1.13	1	1	0.61
Q9H000	MKRN2	P38936	CDKN1A	1	2.47	1.13	1	1	0.61
Q96K19	RNF170	P38936	CDKN1A	1	2.47	1.13	1	1	0.61
Q7Z4K8	TRIM46	P38936	CDKN1A	1	2.47	1.13	1	1	0.61
Q86UV6	TRIM74	P38936	CDKN1A	1	2.47	1.13	1	1	0.61
Q63HN8	RNF213	P38936	CDKN1A	1	2.47	1.13	1	1	0.61
Q96Q27	ASB2	P38936	CDKN1A	1	1	1	1	2.8	0.61
Q9H4P4	RNF41	P38936	CDKN1A	1	2.47	1.13	1	1	0.61
O75592	MYCBP2	P38936	CDKN1A	1	1	1.51	1.84	1	0.609
O14775	GNB5	P38936	CDKN1A	1	1	1.51	1.84	1	0.609
Q9HC52	CBX8	P38936	CDKN1A	1	1	1.51	1.84	1	0.609
Q9Y2K7	KDM2A	P38936	CDKN1A	1	1	1.51	1.84	1	0.609
O14512	SOCS7	P38936	CDKN1A	1	1	1.51	1.84	1	0.609
P29590	PML	P38936	CDKN1A	1	1	2.33	1.18	1	0.608
P51668	UBE2D1	P38936	CDKN1A	1	1	1.51	1.77	1	0.605
Q9H1K0	ZFYVE20	P38936	CDKN1A	1	1	1.51	1.77	1	0.605
Q12788	TBL3	P38936	CDKN1A	1	1	1.51	1.77	1	0.605
Q15542	TAF5	P38936	CDKN1A	1	1	1.51	1.77	1	0.605
P53804	TTC3	P38936	CDKN1A	1	1	1.25	1	2.12	0.604
Q68DV7	RNF43	P38936	CDKN1A	1	1	1.25	1	2.12	0.604
Q15386	UBE3C	P38936	CDKN1A	1	1	1.25	1	2.12	0.604

## Sheet: NDRG1 
NDRG1 related E3 ligases
E3	E3GENE	SUB	SUBGENE	HOMO	PFAM	GO	NET	MOTIF	SCORE
Q86TM6	SYVN1	Q92597	NDRG1	1	1	1.25	1.84	8.67	0.786
P43034	PAFAH1B1	Q92597	NDRG1	1	1	3.77	1.84	1	0.699
Q86YT6	MIB1	Q92597	NDRG1	1	1	1.51	1.29	3.41	0.695
P46934	NEDD4	Q92597	NDRG1	1	1	3.77	1.77	1	0.695
P22681	CBL	Q92597	NDRG1	1	1	3.98	1.44	1	0.681
Q9UNE7	STUB1	Q92597	NDRG1	1	1	3.98	1.87	1	0.681
Q9HCE7	SMURF1	Q92597	NDRG1	1	1	2.88	2.2	1.06	0.671
P40337	VHL	Q92597	NDRG1	1	1	1.25	2.3	2.12	0.662
Q00987	MDM2	Q92597	NDRG1	1	1	1.51	1.44	2.12	0.66
Q9UM11	FZR1	Q92597	NDRG1	1	1	1.51	1.44	2.12	0.66
Q8TCQ1	2018-03-01	Q92597	NDRG1	1	1	1.25	1	2.8	0.633
Q96PU5	NEDD4L	Q92597	NDRG1	1	1	1.24	1	2.8	0.632
P53804	TTC3	Q92597	NDRG1	1	1	1.25	1.29	2.12	0.63
Q9HC52	CBX8	Q92597	NDRG1	1	1	1.78	2.3	1	0.622
Q13309	SKP2	Q92597	NDRG1	1	1	1	1.44	2.12	0.619
Q66K89	E4F1	Q92597	NDRG1	1	1	1.51	1.84	1	0.609
Q149N8	SHPRH	Q92597	NDRG1	1	1	1.51	1.84	1	0.609
Q12834	CDC20	Q92597	NDRG1	1	1	1.51	1.84	1	0.609
P14373	TRIM27	Q92597	NDRG1	1	1	1.51	2.39	1	0.609
Q96Q27	ASB2	Q92597	NDRG1	1	1	1	1.29	2.12	0.608
Q9NWF9	RNF216	Q92597	NDRG1	1	1	1	1.29	2.12	0.608
O43684	BUB3	Q92597	NDRG1	1	1	1.51	1.77	1	0.605
Q9NSE2	CISH	Q92597	NDRG1	1	1	1.51	1.77	1	0.605
O14512	SOCS7	Q92597	NDRG1	1	1	1.51	1.77	1	0.605
P55735	SEC13	Q92597	NDRG1	1	1	1.51	1.77	1	0.605
Q96GD4	AURKB	Q92597	NDRG1	1	1	1.51	1.77	1	0.605
O95714	HERC2	Q92597	NDRG1	1	1	1.25	1	2.12	0.604
Q86YJ5	2018-03-09	Q92597	NDRG1	1	1	1.25	1	2.12	0.604
Q68DV7	RNF43	Q92597	NDRG1	1	1	1.25	1	2.12	0.604

## Sheet: overlap
Overlapped E3 ligases
E3	E3GENE
P22681	CBL
P46934	NEDD4
P14373	TRIM27
Q86YT6	MIB1
Q86TM6	SYVN1
Q9UNE7	STUB1
Q9HCE7	SMURF1
P43034	PAFAH1B1
P40337	VHL
Q96GD4	AURKB
O43684	BUB3
Q96PU5	NEDD4L
Q9UM11	FZR1
Q66K89	E4F1
O95714	HERC2
Q96Q27	ASB2
Q9HC52	CBX8
O14512	SOCS7
P53804	TTC3
Q68DV7	RNF43
